# Supplementary material
Source: ML conference proceedings conference paper supplement (https://proceedings.mlr.press/v108/zandieh20a.html)
Supplement: Supplementary file 1 [file zandieh20a-supp.zip]

Archive with 8 entries (8 files):
- appendices.pdf
- ConjugateGradient.py
- ExactRegressionMatern.py
- Experiments-Real-Data.xlsx
- KRR results.xlsx
- LSHLaplace.py
- LSHRegression.py
- Synthetic Results.xlsx
