# Supplementary material
Source: ML conference proceedings conference paper supplement (https://proceedings.mlr.press/v108/zandieh20a.html)
Supplement: Supplementary file 1 [file zandieh20a-supp.zip › Experiments-Real-Data.xlsx]

## Sheet: Sheet1
Wine Data	training data = 4000
dim = 11	test data = ﻿2497
lambda = 0.5		Exact methods + CG:	laplace	gaussian	matern 5/2	FF , (m=7000)
epsilon_CG = 1		RMSE:	﻿0.684	﻿0.728	﻿0.709	﻿0.737
		time:	﻿28.2	﻿30.2	﻿74.4	﻿1.59
		# lsh instances (m) = ﻿350	LSH
		RMSE:	﻿0.706
		time:	﻿9.9
Forest Data	training data = ﻿500000
dim = ﻿54	test data = ﻿﻿81012
lambda = 0.5		Exact methods + CG:	laplace	gaussian	matern 5/2	Gaussian FF , (m=1500)
epsilon_CG = 1		RMSE:	n.a	n.a	n.a	﻿0.968
		time:	>15 hrs	>15 hrs	>15 hrs	357
		# lsh instances (m) = 50
		RMSE:	﻿0.726
		time:	﻿1081
CT Data	training data = ﻿35000
dim = ﻿384	test data = ﻿﻿18500
lambda = 0.5		Exact methods + CG:	laplace	gaussian	matern 5/2	Gaussian FF , (m=3000)
epsilon_CG = 1		RMSE:	n.a	n.a	n.a	﻿﻿4.19
		time:	>15 hrs	>15 hrs	>15 hrs	38
		# lsh instances (m = 30)
		RMSE:	﻿3.91
		time:	﻿424
Insurance Data	training data = 5822
dim = 85	test data = ﻿4000
lambda = 1		Exact methods + CG:	laplace	gaussian	matern 5/2	Gaussian FF , (m=5000)
epsilon_CG = 1		RMSE:	﻿0.231	﻿0.231	﻿0.231	﻿0.231
		time:	165	﻿185	﻿329	﻿2.23
		# lsh instances (m = ﻿200)	LSH
		RMSE:	﻿0.232
		time:	43
