# Supplementary material
Source: ML conference proceedings conference paper supplement (https://proceedings.mlr.press/v108/zandieh20a.html)
Supplement: Supplementary file 1 [file zandieh20a-supp.zip › KRR results.xlsx]

## Sheet: Sheet1
Data set	Kernel width	Regularizer	Fourier features	Nystrom	TensorSketch	Row norm sampling	Leverage score sampling
Wine Quality	20	0.5	﻿0.759 , 1 sec , m=3000	﻿0.755 , 5 sec , m=1000	﻿0.755 , 1.5 min , q=64 , m=1000	﻿0.754 , 7 sec , q=64 , m=3500	﻿0.752 , 1.5 min , q=64 , m=600
Insurance	21	0.5	﻿0.231 , 1 sec , m=2000	0.231 , 1.5 min , m=2000	﻿0.231 , 20 sec , q=1 , m=1000	﻿0.231 , 2 sec , q=16 , m=﻿1500	﻿0.232 , 5 sec , q=16 , m=400
CT Slicer	40	0.5	﻿3.89 , 1 min , m=4000	﻿﻿3.99 , 7 min , m=1300	﻿3.70 , 4 min , q=4 , m=5120	﻿3.68 , 3 min , q=4 , m=6000	﻿3.77 , 8 min , q=4 , m=3200
Forest Cover	12	0.5	﻿1.00 , 3 min, m=1000	1.03 , 8 min , m=500	﻿1.05 , 2.5 min , q=4 , m=320	﻿1.08 , 4.5 min , q=4 , m=1000	﻿1.06 , 6 min , q=4 , m=600
