# Supplementary material
Source: ML conference proceedings conference paper supplement (https://proceedings.mlr.press/v108/zandieh20a.html)
Supplement: Supplementary file 1 [file zandieh20a-supp.zip › Synthetic Results.xlsx]

## Sheet: Sheet1
Synthetic Data from GP on domain [0,1]^d
Train data=﻿3000, Test data=﻿1000
		Test Err
d=30, lambda, k(x)=e^{-\|x\|_2^2/15}	Laplace	﻿0.128
	Matern 5/2	﻿0.093
	GenKernel	﻿0.088
	Gussian	﻿0.086
d=5, lambda=0.3, k(x)=e^{-\|x\|_2^2}		Test Err
	Laplace	﻿0.043
	Matern 5/2	﻿0.032
	GenKernel	﻿0.029
	Gussian	﻿0.031
d=5, lambda=0.01, k(x)=e^{-\|x\|_1/4}		Test Err
	Laplace	﻿0.103
	Matern 5/2	﻿0.226
	GenKernel	﻿0.166
	Gussian	﻿0.230
d=30, lambda=0.3, k(x)=e^{-\|x\|_1/15}		Test Err
	Laplace	﻿0.385
	Matern 5/2	﻿0.481
	GenKernel	﻿0.438
	Gussian	﻿0.479
d=5, lambda=0.3, k(x)=Matern 5/4 with scale=1		Test Err
	Laplace	﻿0.013
	Matern 5/2	﻿0.013
	GenKernel	﻿0.012
	Gussian	﻿0.016
d=30, lambda=0.5, k(x)=Matern 5/4 with scale=1		Test Err
	Laplace	﻿0.335
	Matern 5/2	﻿0.299
	GenKernel	﻿0.294
	Gussian	﻿0.291
